# Supplementary material for: TMUB1 Inhibits BRL-3A Hepatocyte Proliferation by Interfering with the Binding of CAML to Cyclophilin B through its TM1 Hydrophobic Domain
Source: PubMed Central journal article supplement (PMC6028644; doi:10.1038/s41598-018-28339-4), 2018-07-02
Supplement: 41598_2018_28339_MOESM1_ESM.pdf [file 41598_2018_28339_MOESM1_ESM.pdf]

# **TMUB1 Inhibits BRL-3A Hepatocyte Proliferation by Interfering with the Binding of CAML to Cyclophilin B through its TM1 Hydrophobic Domain.**

**Xiang Lan, Hangwei Fu, Guangyao Li, Wei Zeng, Xia Lin, Yuanxin Zhu, Menggang Liu\*, Ping Chen\***

Department of Hepatobiliary Surgery, the Third Affiliated Hospital, the Third Military Medical University, Chongqing, China

\*Correspondence to: Menggang Liu or Ping Chen, MD, PhD, Department of Hepatobiliary Surgery, the Third Affiliated Hospital, the Third Military Medical University, 10 Changjiang Branch Road, Yuzhong district Chongqing, China. Postal code: 400042 Email: liumenggang1978@163.com (Menggang Liu) or chenpingsyd@126.com (Ping Chen)

Telephone: 0086-023-68757968 Fax: 0086-023-68757963

Financial support:

1. Supported by the Innovation Funds of the Third Affiliated Hospital of the Third Military Medical University (No. 50116-2299): The mechanism of TMUB1's interaction with CAML during liver regeneration.

2. Supported by the National Nature Science Foundation of China (No. 81270523): Influence of Tmub1 protein on the ubiquitination-like mechanism of securin in the hepatocyte cycle in liver regeneration.

# Gene sequence

## Tmubl sequence:

Transmembrane and ubiquitin-like domain-containing protein 1, Rattus norvegicus (245 aa)

MALIEGVGDEVTVLFSVLACLVLALAWVSTHTTESTDPLPQSSGTTTPAQPSEAMTAIDSIREEAPGAESPSLRH  
RGPSAQPEPEAGVTASTPPDSPQEP LLLRLKFLNDSEQVARAWPQDTIGSLKRTQFPGREQQVRLIYQGQLLGD  
DTQTLGSLHLPPNCVLHCHVSTRVGP PPHPPCPPGSEPGPSGLEI GSLLLPLLLLLLLLLLWYCQIQYRPF FPLTATLGL  
AGFTLLLSLLAFAMYRP

TM1 TM2 UL

## TMUB1 CDS sequence:

Atggcctgattgaaggcgtaggggatgaggtagctgtcctttttcgggtgctgctgccttctggtgctggccctcgctgggtctcaacaca  
tacgactgagagtacagatcccctaccacagtcgtcaggaccacaacaccagcacagcccagtgaggccatgacagccattgatagcatc  
agagaggaggccccaggagctgagagtcctcagcctgaggcagaggtccatctgcacagccagagcctgaggcaggggtcacagcatc  
aacacctccagactctccacaggaaccttactgctacggtgaaatttctcaatgactctgaacaggtggccagggcctggcctcaggaca  
ccattggctcctgaaaagaaccagttccaggccgggaacagcaggtcgactcatctaccaaggccaactgctaggagacgacacca  
gacactgggcagctccacctcccccaactcgttctccactgccagtgctcacaagagtcggtccccgcacatcctccctgccaccggg  
gtcagagcccggcccctccgggctggaaatcggcagccttctgtgccctgctgctctgctgctcctgctggtactgacagatccagtcagtc  
accggccctcttccctgaccgctacttgggctggcggcttaccctgctcctcagtcctggtttgcatgtatgcccgtag

TM1 (580-642 bp)

TM2 (655-717 bp)

UL (304-525 bp)

## Flag tag coded sequence:

ATGGATTACAAGGATGACGACGATAAG

## Synthetic sequences

### Flag-Tmubl

ATGGATTACAAGGATGACGACGATAAGatggccttgattgaaggcgtaggggatgaggtgactgtcctttttcgggtctgctgcctg  
ccttctggtgctggccctgcctgggtctcaacacatacgactgagagtaacagatcccctaccacagtctcagggaccacaacaccagcac  
agcccagtgaaagccatgacagccattgatagcatcagagaggaggcccaggagctgagagctccagcctgaggcacagaggtccatctg  
cacagccagagcctgaggcaggggtcacagcatcaaacctccagactctccacaggaaccttactgctacggttgaaatttcaatgact  
ctgaacaggtggccagggcctggcctcaggacaccattggctcctgaaaagaaccagttccaggccgggaacagcaggttcgactcat  
ctaccaaggccaactgctaggagacgacacccagacactggcagctccacctcccccaactgcgttctccactgccagtgccaca  
gagtcggtccccgcacctcctgcccaccgggtcagagcccggccctccgggtggaaatcggcagccttctgttccccctgctctc  
gctgctcctgctctggtactccagatccagtaaccgccccttcttcccctgaccgctacttggcctggccggttccacctgctctca  
gtctcctggccttgccatgtatgcccgtag

### 1. Flag- $\Delta$ TM1: knockout 580—642 bp

ATGGATTACAAGGATGACGACGATAAGatggccttgattgaaggcgtaggggatgaggtgactgtcctttttcgggtctgctgcctg  
ccttctggtgctggccctgcctgggtctcaacacatacgactgagagtaacagatcccctaccacagtctcagggaccacaacaccagcaca  
gcccagtgaaagccatgacagccattgatagcatcagagaggaggcccaggagctgagagctccagcctgaggcacagaggtccatctg  
acagccagagcctgaggcaggggtcacagcatcaaacctccagactctccacaggaaccttactgctacggttgaaatttcaatgact  
ctgaacaggtggccagggcctggcctcaggacaccattggctcctgaaaagaaccagttccaggccgggaacagcaggttcgactcat  
ctaccaaggccaactgctaggagacgacacccagacactggcagctccacctcccccaactgcgttctccactgccagtgccaca  
gagtcggtccccgcacctcctgcccaccgggtcagagcccggccctccgggtggaaacagtaaccgccccttcttcccctgaccgta  
ccttggcctggccggttccacctgctctcagctcctggtccttgccatgtatgcccgtag

### 2. Flag- $\Delta$ TM2: knockout 655—717 bp

ATGGATTACAAGGATGACGACGATAAGatggccttgattgaaggcgtaggggatgaggtgactgtcctttttcgggtctgctgcctg  
ccttctggtgctggccctgcctgggtctcaacacatacgactgagagtaacagatcccctaccacagtctcagggaccacaacaccagcaca  
gcccagtgaaagccatgacagccattgatagcatcagagaggaggcccaggagctgagagctccagcctgaggcacagaggtccatctg  
acagccagagcctgaggcaggggtcacagcatcaaacctccagactctccacaggaaccttactgctacggttgaaatttcaatgact  
ctgaacaggtggccagggcctggcctcaggacaccattggctcctgaaaagaaccagttccaggccgggaacagcaggttcgactcat  
ctaccaaggccaactgctaggagacgacacccagacactggcagctccacctcccccaactgcgttctccactgccagtgccaca

gagtcggtccccgcacctcctgcccaccgggtcagagcccggccctccgggctggaaatcggcagccttctgtgcccctgctgcttct  
gctgctgctcctgctggtactgccaagatccagtaaccggcccttgccatgtatgccgtag

### 3. Flag- $\Delta$ UL1: knockout 304-453 bp

ATGGATTACAAGGATGACGACGATAAGatggcctgattgaaggcgtaggggatgaggtgactgtccttttctggtgctgctg  
ccttctggtgctggccctgcctgggtctcaacacatacactgagagtaacagatcccctaccacagtcgtcagggaccacaacaccagcac  
agcccagtgaaagccatgacagccattgatagcatcagagaggaggcccaggagctgagagtcccagcctgaggcacagaggtccatctg  
cacagccagagcctgaggcagggtcaacacatcaacacctccagactctccacaggaaccaccagacactggcagctccaccttcc  
ccccactgcttctccactgccagtgccaagagtcggtccccgcacctcctgcccaccgggtcagagcccggccctccgggct  
ggaaatcggcagccttctgtgcccctgctgcttctgctgctgctcctgctggtactgccaagatccagtaaccggcccttcttcccctgaccgc  
tacctgggctgcccggctcaccctgctcctcagctcctggccttgccatgtatgccgtag

### 4. Flag- $\Delta$ UL2: knockout 376-525 bp

ATGGATTACAAGGATGACGACGATAAGatggcctgattgaaggcgtaggggatgaggtgactgtccttttctggtgctgctg  
ccttctggtgctggccctgcctgggtctcaacacatacactgagagtaacagatcccctaccacagtcgtcagggaccacaacaccagcac  
agcccagtgaaagccatgacagccattgatagcatcagagaggaggcccaggagctgagagtcccagcctgaggcacagaggtccatctg  
cacagccagagcctgaggcagggtcaacacatcaacacctccagactctccacaggaaccctactgctacggtgaaatttctcaatgac  
tctgaacaggtggccaggcctggcctcaggacaccattggccccgcacctcctgcccaccgggtcagagcccggccctccgggct  
ggaaatcggcagccttctgtgcccctgctgcttctgctgctgctcctgctggtactgccaagatccagtaaccggcccttcttcccctgaccgc  
tacctgggctgcccggctcaccctgctcctcagctcctggccttgccatgtatgccgtag

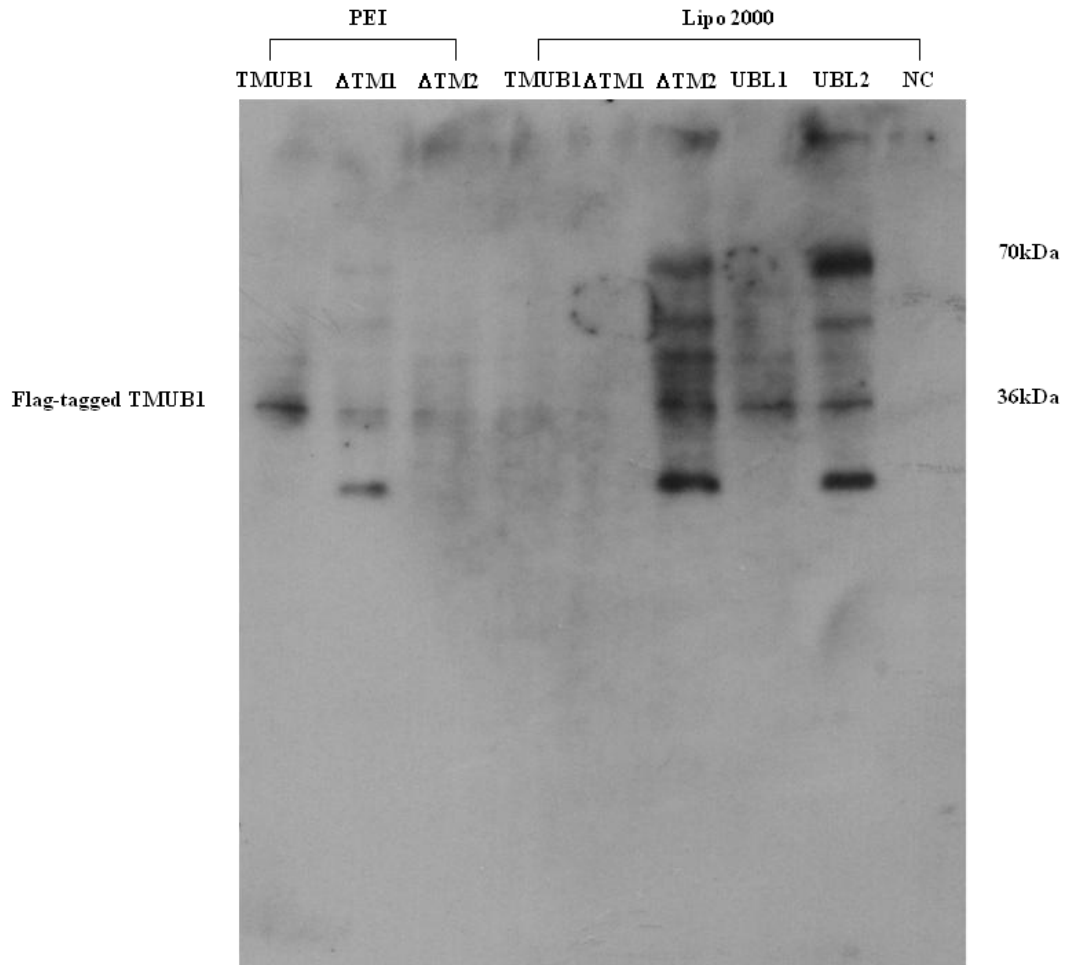

**Fig 1.** The first plasmid transfection with BRL-3A hepatocytes. PEI and Lipo 2000 was tested respectively. BRL-3A rat hepatocytes were cultured in high-glucose DMEM supplemented with 10% fetal bovine serum at 37°C with 5% CO<sub>2</sub>. When the hepatocytes reached 80-90% confluence, they were passaged and placed in a 100-mm culture dish. After 24 hours, when the cells had reached 40-60% confluence, they were passaged and placed in DMEM without penicillin-streptomycin. A total of 21 μl PEI or 72 μl LipoFiter™ was mixed with 979 ml DMEM (PEI) or 928 ml DMEM (Lipo 2000) in a 100-mm culture dish and was not disturbed for 5 min. The final concentration of the plasmid was 7-8 μg (PEI) or 24 μg (Lipo 2000) DNA/1 ml DMEM. The two abovementioned solutions were mixed, left undisturbed for 20 min and added to DMEM in a 100-mm culture dish with a final volume of 12 ml. The cells were cultured at 37°C with 5% CO<sub>2</sub> for 7 hours and were then changed from DMEM to high-glucose DMEM supplemented with 10% fetal bovine serum. After 24 hours, the cells were collected, and protein was extracted for Western blot analysis with an anti-Flag antibody.

In this transfection experiment, we can see flag-tagged TMUB1 was tested in both kinds of transfection solution but with lower transfection efficiency. Hepatocytes suffered from extensive death. We thought it was due to long time incubation with transfection solution. So we operated a second transfection experiments and decreased the incubation time to 4-6 hours.

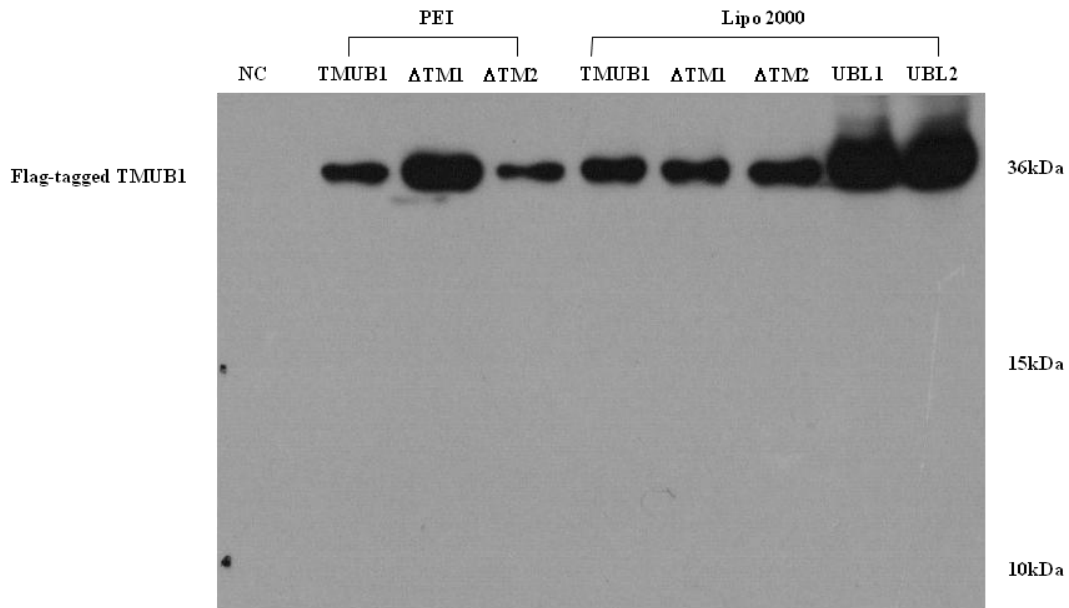

**Fig 2.** The second plasmid transfection with BRL-3A hepatocytes. PEI and Lipo 2000 was tested respectively. BRL-3A rat hepatocytes were cultured in high-glucose DMEM supplemented with 10% fetal bovine serum at 37°C with 5% CO<sub>2</sub>. When the hepatocytes reached 80-90% confluence, they were passaged and placed in a 100-mm culture dish. After 24 hours, when the cells had reached 40-60% confluence, they were passaged and placed in DMEM without penicillin-streptomycin. A total of 21 μl PEI or 72 μl LipoFiter™ was mixed with 979 ml DMEM (PEI) or 928 ml DMEM (Lipo 2000) in a 100-mm culture dish and was not disturbed for 5 min. The final concentration of the plasmid was 7-8 μg (PEI) or 24 μg (Lipo 2000) DNA/1 ml DMEM. The two above-mentioned solutions were mixed, left undisturbed for 20 min and added to DMEM in a 100-mm culture dish with a final volume of 12 ml. The cells were cultured at 37°C with 5% CO<sub>2</sub> for 4-6 hours and were then changed from DMEM to high-glucose DMEM supplemented with 10% fetal bovine serum. After 24 hours, the cells were collected, and protein was extracted for Western blot analysis with an anti-Flag antibody.

In this transfection experiment, we can see flag-tagged TMUB1 was tested in both kinds of transfection solution with satisfied transfection efficiency. Hepatocytes suffered from extensive death. We thought it was due to long time incubation with transfection solution. So we operated a second transfection experiment and decreased the incubation time to 4-6 hours.

So we chose Lipo 2000 as the transfection solution and incubation time was 4-6 hours.

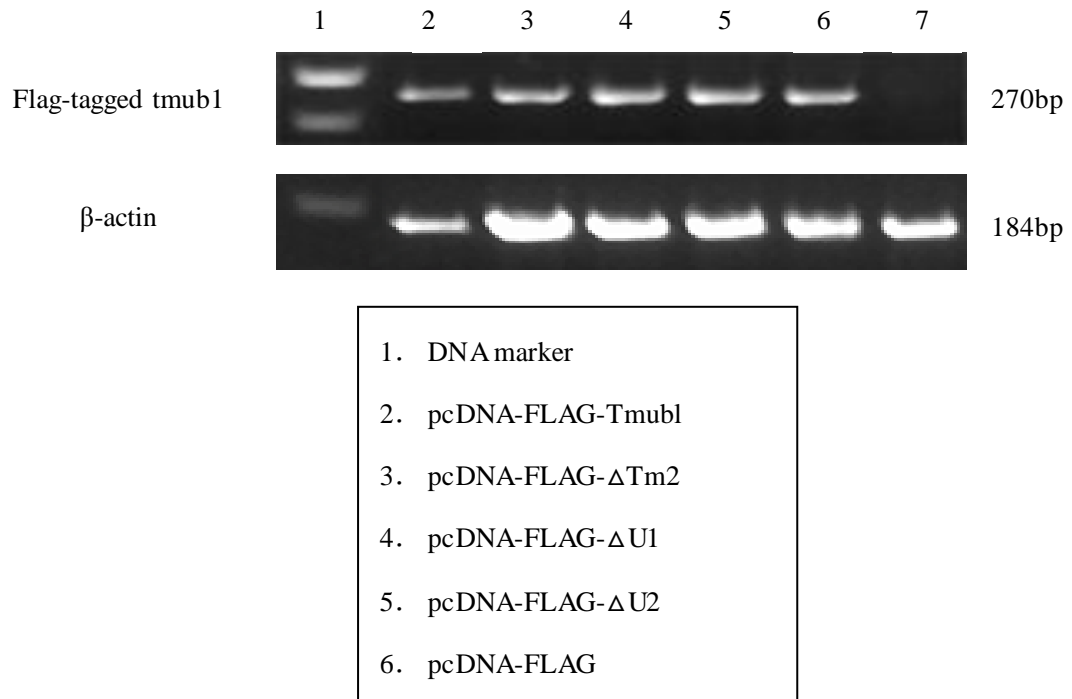

**Fig3. PCR test for hypatocytes plasmid transfection.** The sense primers are located in the region of Flag and the anti-sense primers are located in the region of Tmub1. The sense and antisense primers for pcDNA-FLAG-Tmub1 and its mutant amplification are as follows: 5'-AAGGATGACGACGATAAGAT-3' and 5'-GAGGTGTTGATGCTGTGA-3', respectively.

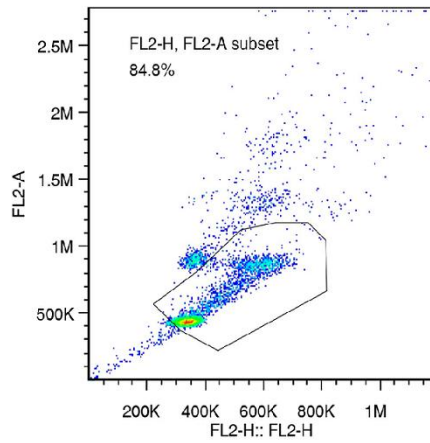

C06 6.fcs  
 FSC-A, SSC-A subset  
 8070

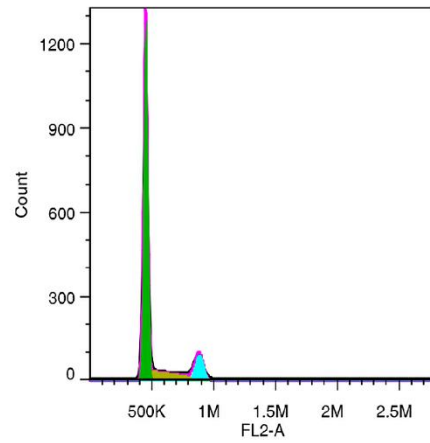

C06 6.fcs  
 Cell Cycle  
 Dean-Jett-Fox  
 RMS = 1.46  
 G1 = 73.45  
 S = 15.31  
 G2 = 11.27  
 G1(mean) = 2731761.14  
 G2(mean) = 5339320.86  
 G1 cv = 5.21  
 G2 cv = 5.54  
 sub-G1 = -1.07  
 super-G2 = 0.25  
  
 6841

**Fig4A. Cell cycle tested: G0/G1 phase 0h**



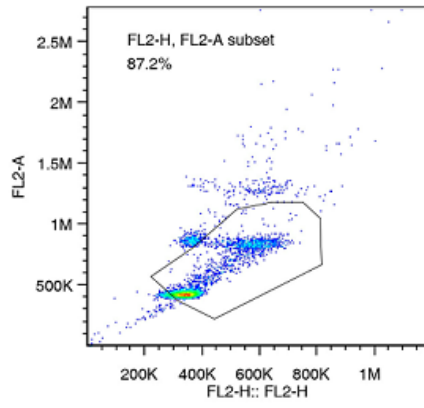

C07 7.fcs  
FSC-A, SSC-A subset  
7642

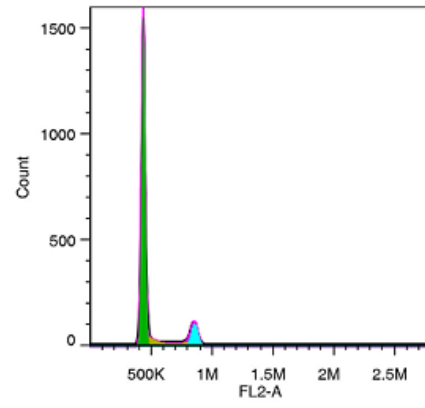

C07 7.fcs  
Cell Cycle  
Dean-Jett-Fox  
RMS = 2.26  
G1 = 76.06  
S = 13.83  
G2 = 10.18  
G1(mean) = 2643729.46  
G2 (mean) = 5184530.88  
G1 cv = 4.44  
G2 cv = 4.52  
sub-G1 = -1.14  
super-G2 = -0.04  
  
6665

**Fig4B. Cell cycle tested: G0/G1 phase 2h**

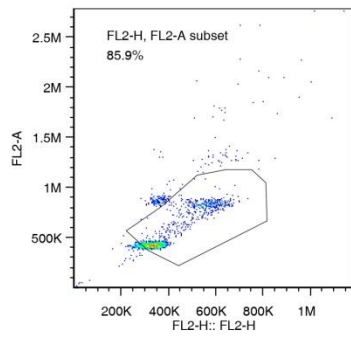

C08 8.fcs  
FSC-A, SSC-A subset  
3251

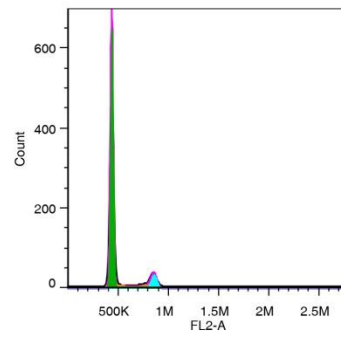

C08 8.fcs  
Cell Cycle  
Dean-Jett-Fox  
RMS = 1.13  
G1 = 80.79  
S = 10.71  
G2 = 8.4  
G1 (mean) = 2651772.87  
G2 (mean) = 5185776.67  
G1 cv = 4.56  
G2 cv = 4.78  
sub-G1 = -0.56  
super-G2 = -0.2  
  
2794

**Fig4C. Cell cycle tested: G0/G1 phase 4h**

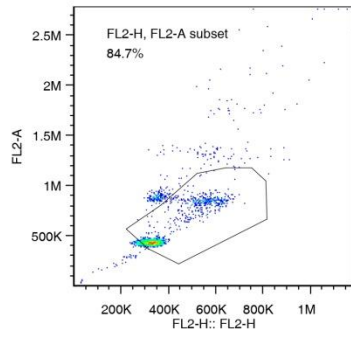

C09 9.fcs  
 FSC-A, SSC-A subset  
 3440

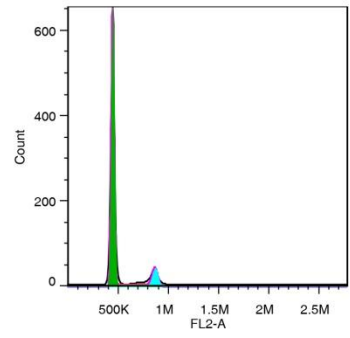

C09 9.fcs  
 Cell Cycle  
 Dean-Jett-Fox  
 RMS = 1.06  
 G1 = 82.83  
 S = 7.29  
 G2 = 9.54  
 G1(mean) = 2708180.14  
 G2 (mean) = 5246335.81  
 G1 cv = 4.82  
 G2 cv = 4.61  
 sub-G1 = -0.21  
 super-G2 = 0.73  
 2914

**Fig4D. Cell cycle tested: G0/G1 phase 6h**

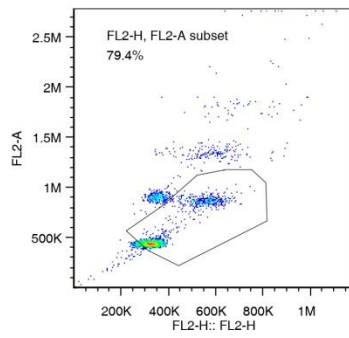

C10 10.fcs  
 FSC-A, SSC-A subset  
 4115

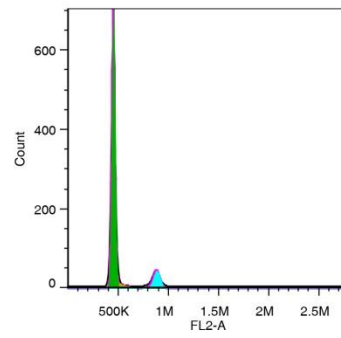

C10 10.fcs  
 Cell Cycle  
 Dean-Jett-Fox  
 RMS = 0.7  
 G1 = 82.55  
 S = 6.99  
 G2 = 10.47  
 G1 (mean) = 2744273.51  
 G2 (mean) = 5345305.26  
 G1 cv = 5.07  
 G2 cv = 5.29  
 sub-G1 = -0.87  
 super-G2 = 0.13  
  
 3266

**Fig4E. Cell cycle tested: G0/G1 phase 8h**

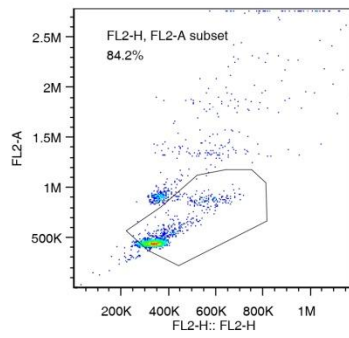

C11 11.fcs  
FSC-A, SSC-A subset  
3906

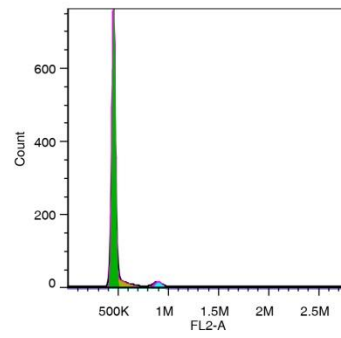

C11 11.fcs  
Cell Cycle  
Dean-Jett-Fox  
RMS = 0.59  
G1 = 84.05  
S = 12.02  
G2 = 3.76  
G1 (mean) = 2761599.02  
G2 (mean) = 5449474.43  
G1 cv = 4.82  
G2 cv = 5.48  
sub-G1 = -0.74  
super-G2 = 0.02  
  
3290

**Fig4F. Cell cycle tested: G0/G1 phase 10h**

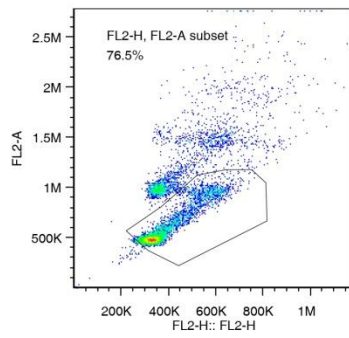

C12 12.fcs  
FSC-A, SSC-A subset  
9655

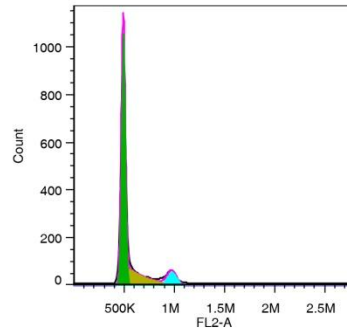

C12 12.fcs  
Cell Cycle  
Dean-Jett-Fox  
RMS = 1.52  
G1 = 67.79  
S = 22.69  
G2 = 8.62  
G1 (mean) = 2981514.39  
G2 (mean) = 5898221.95  
G1 cv = 5.67  
G2 cv = 6.89  
sub-G1 = -0.85  
super-G2 = 0.13  
  
7390

**Fig4G. Cell cycle tested: G0/G1 phase 12h**

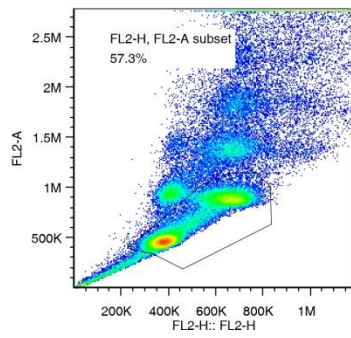

A01 1.fcs  
 FSC-A, SSC-A subset  
 87522

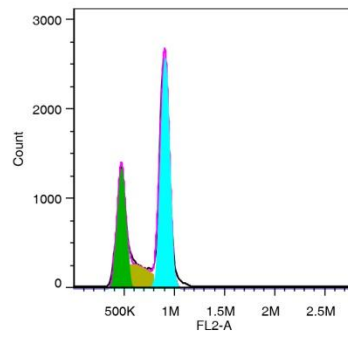

A01 1.fcs  
 Cell Cycle  
 Dean-Jett-Fox  
 RMS = 8.38  
 G1 = 14.51  
 S = 5.15  
 G2 = 78.94  
 G1 (mean) = 2864254.45  
 G2 (mean) = 5475712.71  
 G1 cv = 10.63  
 G2 cv = 7.32  
 sub-G1 = -0.61  
 super-G2 = 1.04  
 50122

**Fig4H. Cell cycle tested: G2/M phase 0h**

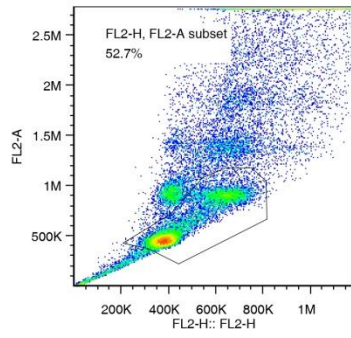

A02 2.fcs  
 FSC-A, SSC-A subset  
 28528

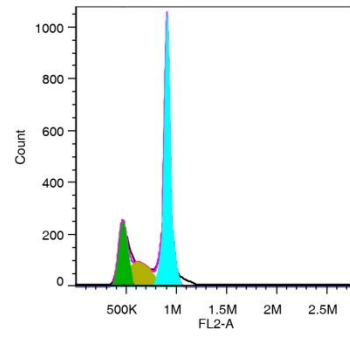

A02 2.fcs  
 Cell Cycle  
 Dean-Jett-Fox  
 RMS = 4.21  
 G1 = 10.64  
 S = 6.75  
 G2 = 79.32  
 G1 (mean) = 2818657.07  
 G2 (mean) = 5513306.6  
 G1 cv = 10.88  
 G2 cv = 8.14  
 sub-G1 = -0.95  
 super-G2 = 0.64  
 15045

**Fig4I. Cell cycle tested: G2/M phase 1h**



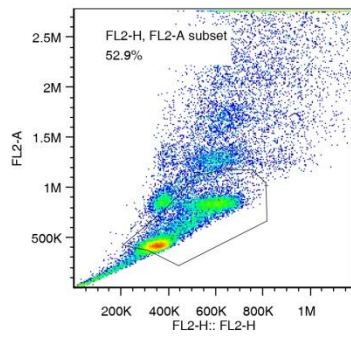

A03.fcs  
 FSC-A, SSC-A subset  
 27965

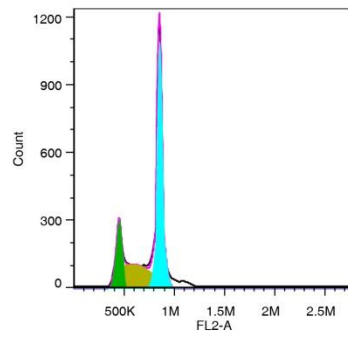

A03.fcs  
 Cell Cycle  
 Dean-Jett-Fox  
 RMS = 3.33  
 G1 = 7.32  
 S = 6.14  
 G2 = 80.57  
 G1 (mean) = 2635887.79  
 G2 (mean) = 5187244.33  
 G1 cv = 8.85  
 G2 cv = 7.28  
 sub-G1 = -0.99  
 super-G2 = 2.77  
  
 14805

**Fig4J. Cell cycle tested: G2/M phase 2h**

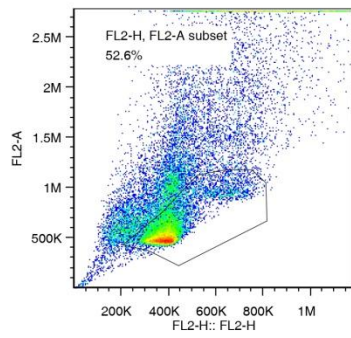

A09 9.fcs  
 FSC-A, SSC-A subset  
 23771

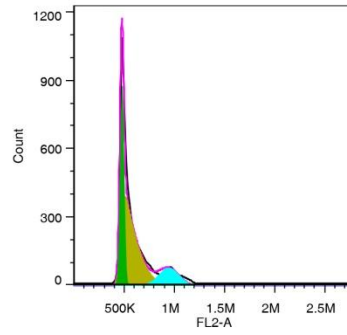

A09 9.fcs  
 Cell Cycle  
 Dean-Jett-Fox  
 RMS = 6.6  
 G1 = 31.22  
 S = 53.65  
 G2 = 14.44  
 G1 (mean) = 2889073.47  
 G2 (mean) = 5690690  
 G1 cv = 5.71  
 G2 cv = 14.99  
 sub-G1 = -5.05  
 super-G2 = 0.78  
  
 12499

**Fig4K. Cell cycle tested: G1/S phase 0h**

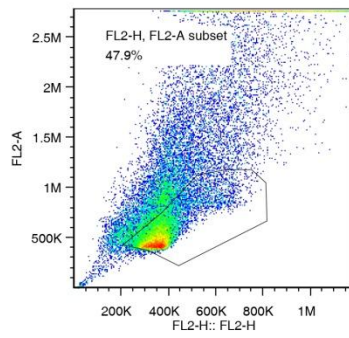

A10 10.fcs  
 FSC-A, SSC-A subset  
 26022

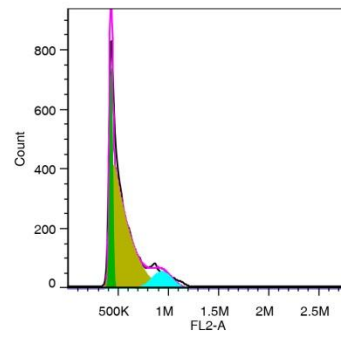

A10 10.fcs  
 Cell Cycle  
 Dean-Jett-Fox  
 RMS = 4.49  
 G1 = 21.21  
 S = 64.48  
 G2 = 10.85  
 G1(mean) = 2594718  
 G2 (mean) = 5630670.99  
 G1 cv = 4.88  
 G2 cv = 15.44  
 sub-G1 = -0.65  
 super-G2 = -0.41  
  
 12469

**Fig4L. Cell cycle tested: G1/S phase 2h**

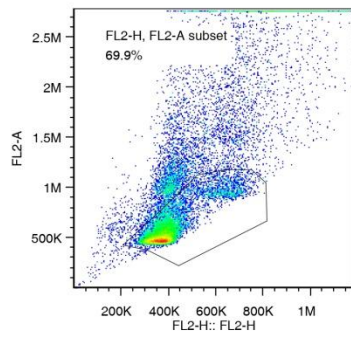

A06 6.fcs  
FSC-A, SSC-A subset  
20238

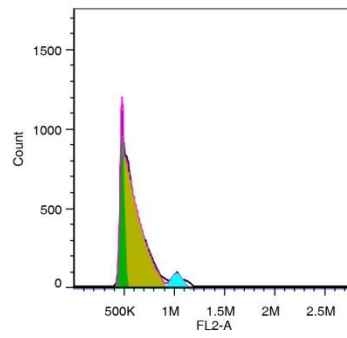

A06 6.fcs  
Cell Cycle  
Dean-Jett-Fox  
RMS = 7.2  
G1 = 17.11  
S = 64.68  
G2 = 10.37  
G1 (mean) = 2899893.39  
G2 (mean) = 5720175  
G1 cv = 4.95  
G2 cv = 12.03  
sub-G1 = -4.07  
super-G2 = 1.88  
  
14151

**Fig4M. Cell cycle tested: G1/S phase 4h**

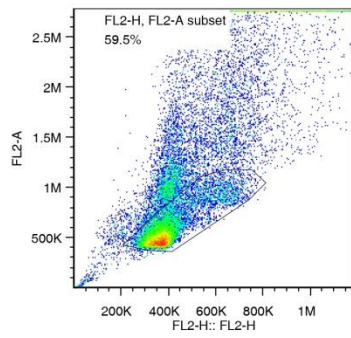

A07 7.fcs  
 FSC-A, SSC-A subset  
 22780

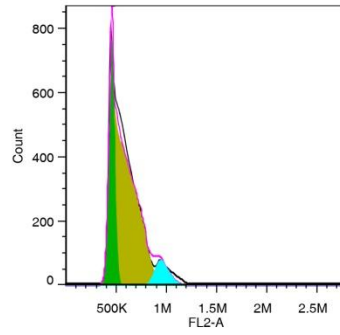

A07 7.fcs  
 Cell Cycle  
 Dean-Jett-Fox  
 RMS = 8.52  
 G1 = 12.46  
 S = 61.34  
 G2 = 10.75  
 G1 (mean) = 2830602  
 G2 (mean) = 5484292  
 G1 cv = 9.76  
 G2 cv = 15.61  
 sub-G1 = -1.29  
 super-G2 = 0.8  
  
 13558

**Fig4N. Cell cycle tested: G1/S phase 6h**

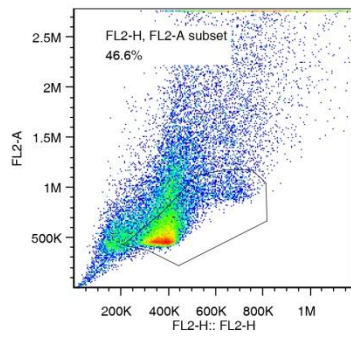

A08.fcs  
 FSC-A, SSC-A subset  
 25317

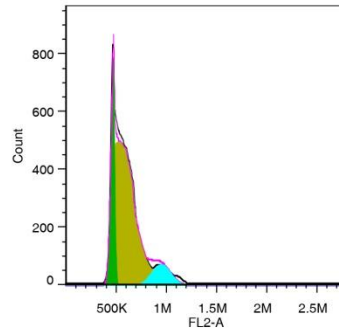

A08.fcs  
 Cell Cycle  
 Dean-Jett-Fox  
 RMS = 8.38  
 G1 = 17.34  
 S = 66.94  
 G2 = 13.93  
 G1 (mean) = 2935067.83  
 G2 (mean) = 5720175  
 G1 cv = 8.53  
 G2 cv = 14.43  
 sub-G1 = 1.8  
 super-G2 = 0.15  
  
 11786

**Fig40. Cell cycle tested: G1/S phase 8h**

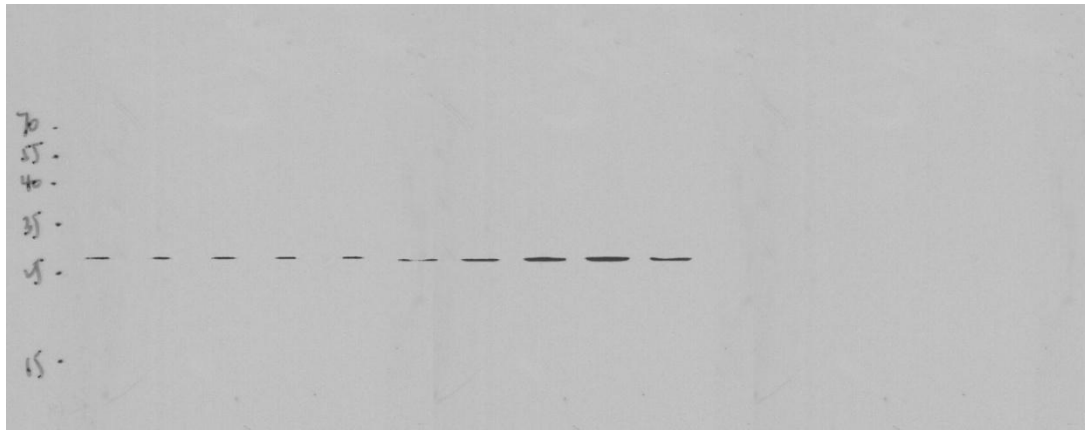

**Fig5A.** Original gel for TMUB1 expression in sham-operated and operated group

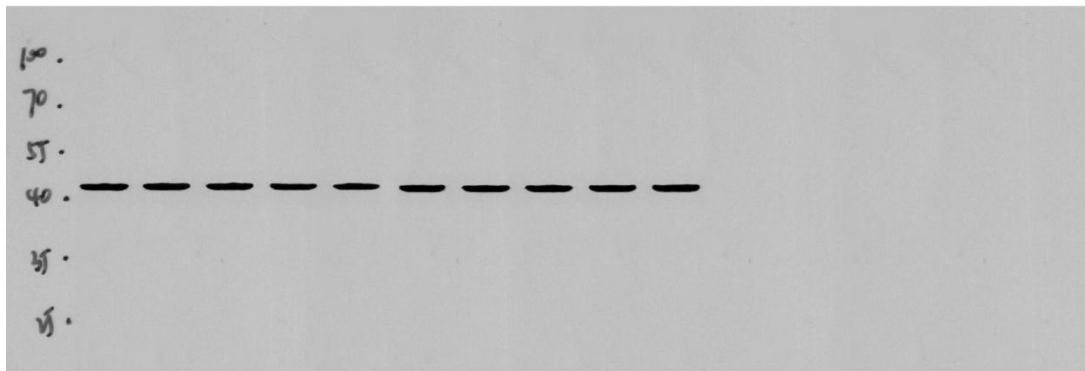

**Fig5B.** Original gel for  $\beta$ -actin expression in sham-operated and operated group

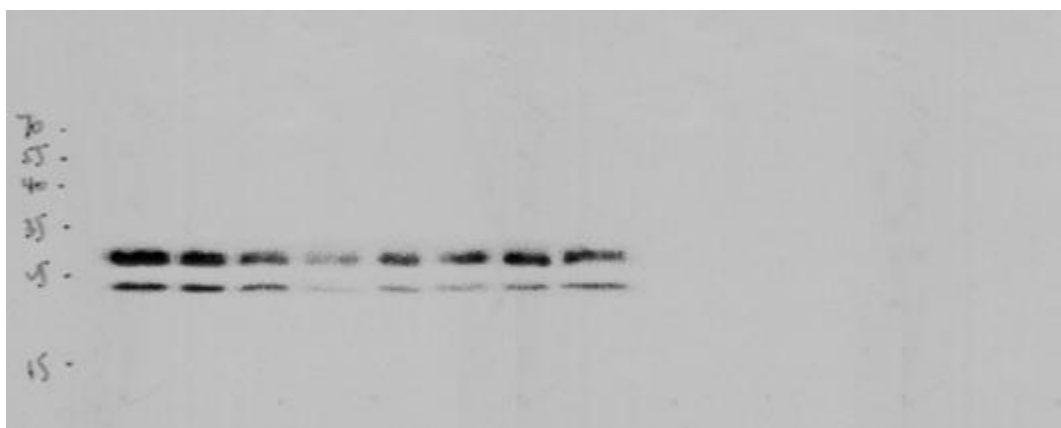

**Fig5C.** The expression of TMUB1 in the M phase and G1/S phase.

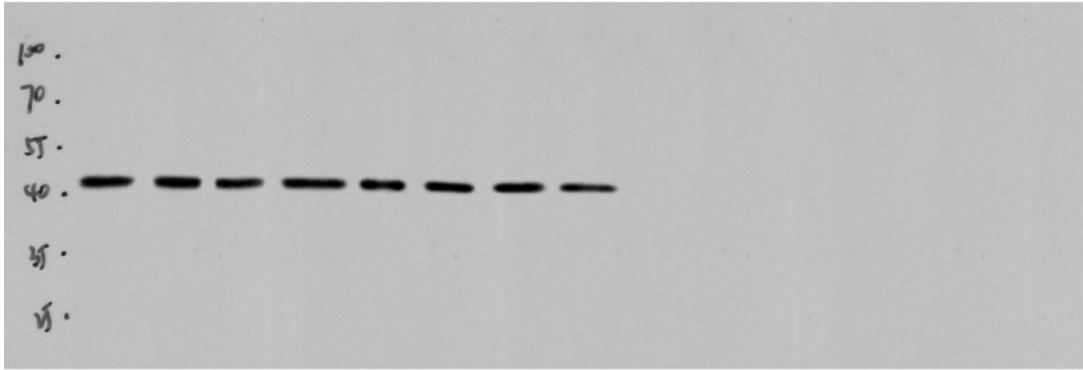

**Fig5D.** The expression of  $\beta$ -actin in the M phase and G1/S phase.

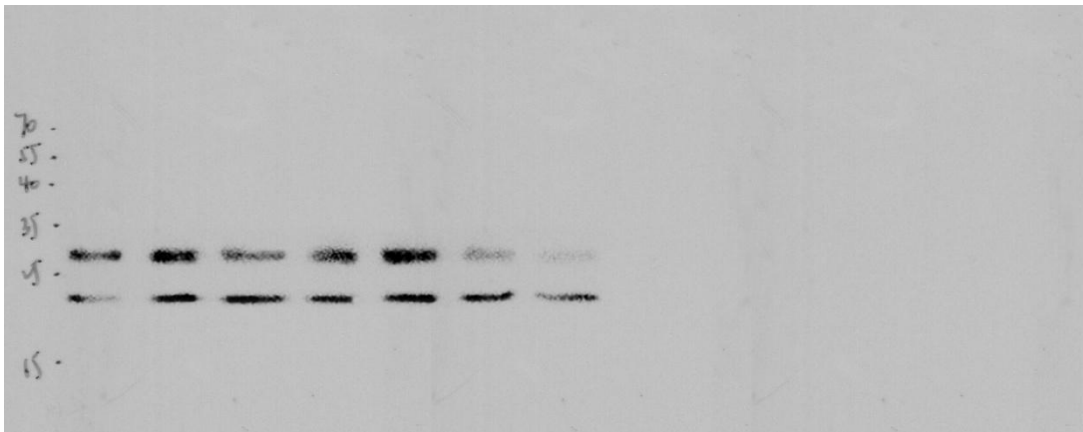

**Fig5E.** The expression of TMUB1 in the G0/G1 phase.

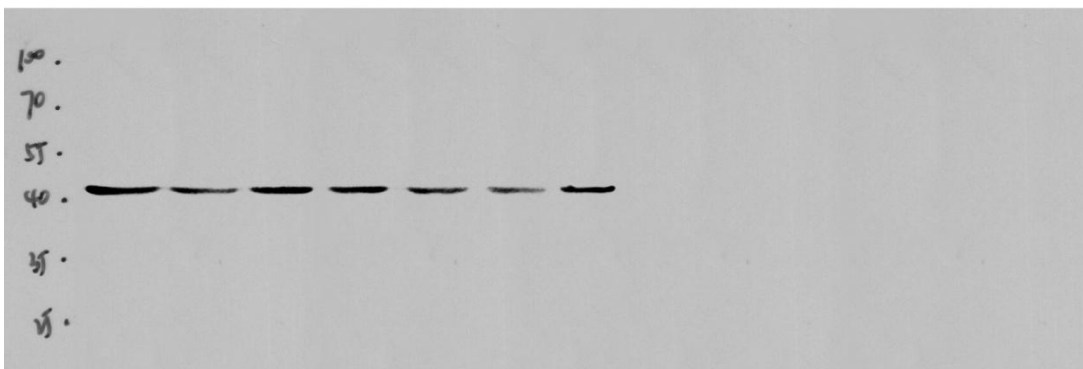

**Fig5F.** The expression of  $\beta$ -actin in the G0/G1 phase.



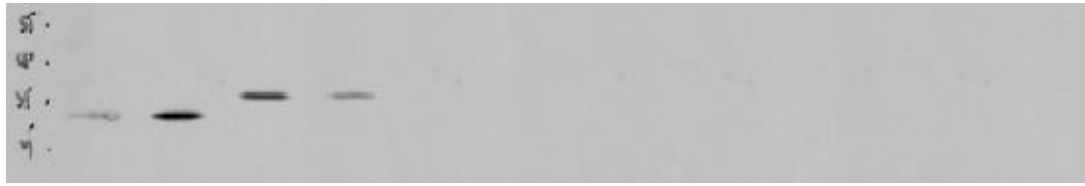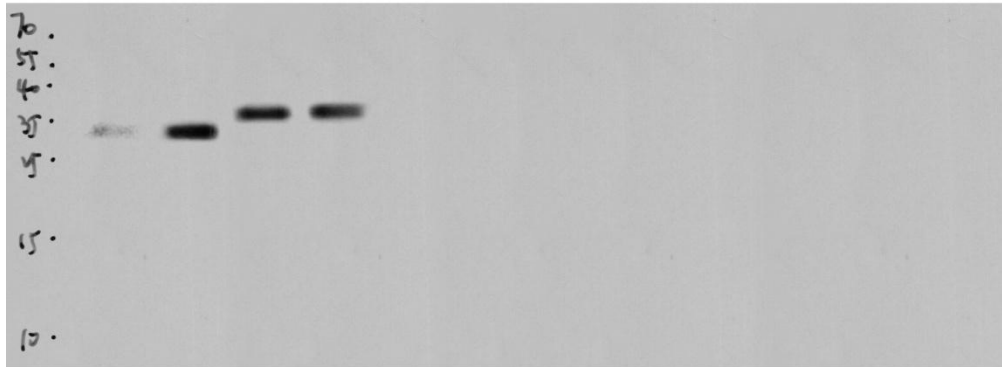

**Fig5G.** The effects of transfection of full-length TMUB1, its mutants and siRNA were tested by Westernblotting

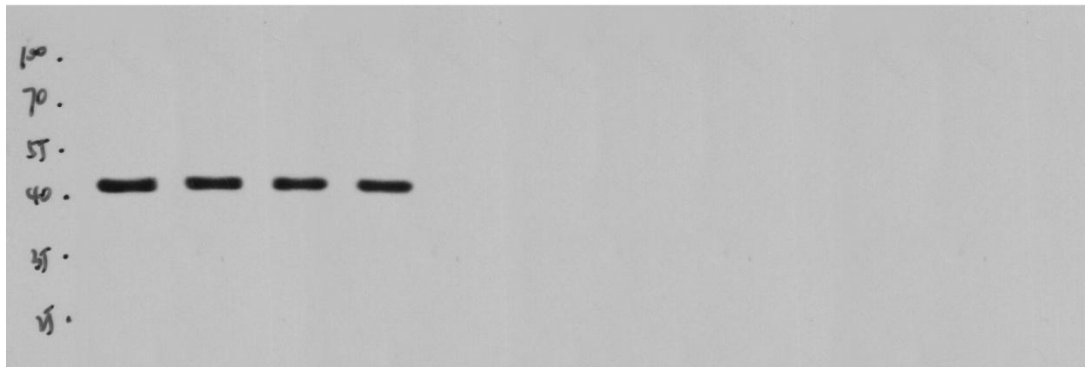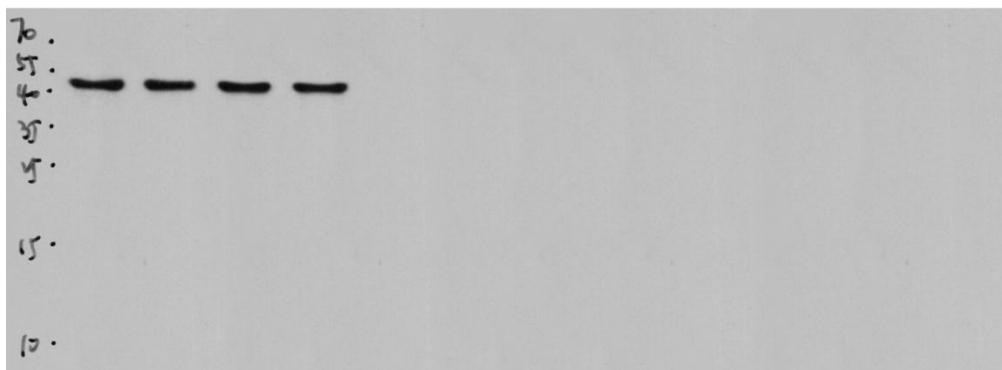

**Fig5H.** The expression of TMUB1 after transfection of full-length TMUB1, its mutants and siRNA were tested by Westernblotting

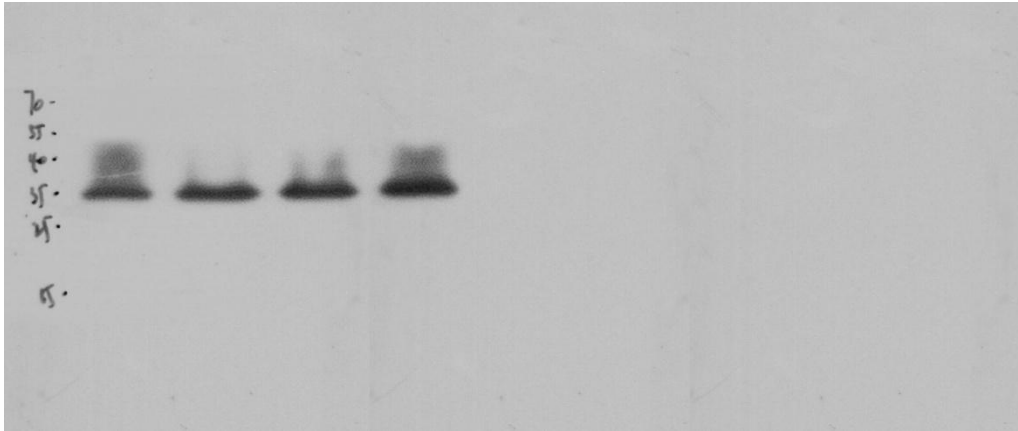

**Fig5I.** The expression of CAML after transfection of full-length TMUB1, its mutants and siRNA were tested by Westernblotting.

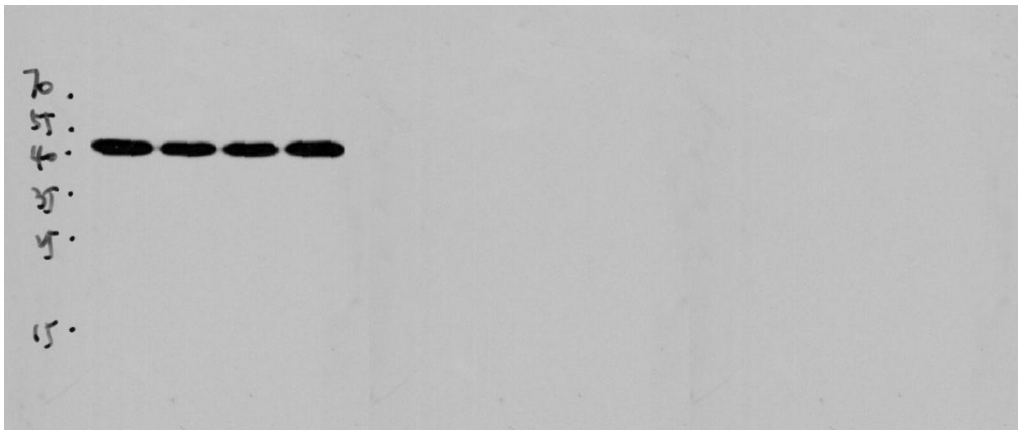

**Fig5J.** The expression of  $\beta$ -actin after transfection of full-length TMUB1, its mutants and siRNA were tested by Westernblotting.
